# Supplementary material for: ionbot: a novel, innovative and sensitive machine learning approach to LC-MS/MS peptide identification
Source: Research Square preprint supplement (doi:10.21203/rs.3.rs-691927/v1), 2021-08-19
Supplement: Supplementary file 1 [file 690adb39d9ddfbe036c7ea02.docx]

| ID | PEPTIDE | LINK |
| --- | --- | --- |
| 1 | IENN[UNIMOD:34]DNKPVTNSR | http://proteomecentral.proteomexchange.org/usi/?usi=mzspec:PXD000561:Adult_CD8Tcells_Gel_Elite_44_f12.mzML:scan:1770:IENN[UNIMOD:34]DNKPVTNSR/4 |
| 1 | IENNENKPVTNSR | http://proteomecentral.proteomexchange.org/usi/?usi=mzspec:PXD000561:Adult_CD8Tcells_Gel_Elite_44_f12.mzML:scan:1770:IENNENKPVTNSR/4 |
| 2 | GSVSIAAIK | http://proteomecentral.proteomexchange.org/usi/?usi=mzspec:PXD000561:Adult_CD8Tcells_Gel_Elite_44_f01.mzML:scan:7310:GSVSIAAIK/2 |
| 2 | SGVSIAAIK | http://proteomecentral.proteomexchange.org/usi/?usi=mzspec:PXD000561:Adult_CD8Tcells_Gel_Elite_44_f01.mzML:scan:7310:SGVSIAAIK/2 |
| 3 | IEEIAAK | http://proteomecentral.proteomexchange.org/usi/?usi=mzspec:PXD000561:Adult_CD8Tcells_Gel_Elite_44_f03.mzML:scan:3025:IEEIAAK/2 |
| 3 | IEQIAAK | http://proteomecentral.proteomexchange.org/usi/?usi=mzspec:PXD000561:Adult_CD8Tcells_Gel_Elite_44_f03.mzML:scan:3025:IEQIAAK/2 |
| 4 | PAPPKPEPR | http://proteomecentral.proteomexchange.org/usi/?usi=mzspec:PXD000561:Adult_CD8Tcells_Gel_Elite_44_f01.mzML:scan:1947:PAPPKPEPR/2 |
| 4 | PAPPKPEPK[UNIMOD:122] | http://proteomecentral.proteomexchange.org/usi/?usi=mzspec:PXD000561:Adult_CD8Tcells_Gel_Elite_44_f01.mzML:scan:1947:PAPPKPEPK[UNIMOD:122]/2 |
| 5 | GQVGGDVNVEMDAAPGVDISR | http://proteomecentral.proteomexchange.org/usi/?usi=mzspec:PXD000561:Adult_CD8Tcells_Gel_Elite_44_f01.mzML:scan:8386:GQVGGDVNVEMDAAPGVDISR/3 |
| 5 | GQTGGDVNVEMDAAPGVDISR | http://proteomecentral.proteomexchange.org/usi/?usi=mzspec:PXD000561:Adult_CD8Tcells_Gel_Elite_44_f01.mzML:scan:8386:GQTGGDVNVEMDAAPGVDISR/3 |
| 6 | ADIDVSGPK | http://proteomecentral.proteomexchange.org/usi/?usi=mzspec:PXD000561:Adult_CD8Tcells_Gel_Elite_44_f01.mzML:scan:4235:ADIDVSGPK/2 |
| 6 | VPGIDATTK | http://proteomecentral.proteomexchange.org/usi/?usi=mzspec:PXD000561:Adult_CD8Tcells_Gel_Elite_44_f01.mzML:scan:4235:VPGIDATTK/2 |
| 7 | IPVEVAYK | http://proteomecentral.proteomexchange.org/usi/?usi=mzspec:PXD000561:Adult_CD8Tcells_Gel_Elite_44_f01.mzML:scan:6609:IPVEVAYK/2 |
| 7 | VGDVYIPR | http://proteomecentral.proteomexchange.org/usi/?usi=mzspec:PXD000561:Adult_CD8Tcells_Gel_Elite_44_f01.mzML:scan:6609:VGDVYIPR/2 |
| 8 | VIIQEEGTR | http://proteomecentral.proteomexchange.org/usi/?usi=mzspec:PXD000561:Adult_CD8Tcells_Gel_Elite_44_f02.mzML:scan:4362:VIIQEEGTR/2 |
| 8 | ISSPATIN[UNIMOD:7]SR | http://proteomecentral.proteomexchange.org/usi/?usi=mzspec:PXD000561:Adult_CD8Tcells_Gel_Elite_44_f02.mzML:scan:4362:ISSPATIN[UNIMOD:7]SR/2 |
| 9 | AQYEEIAQR | http://proteomecentral.proteomexchange.org/usi/?usi=mzspec:PXD000561:Adult_CD8Tcells_Gel_Elite_44_f02.mzML:scan:4018:AQYEEIAQR/2 |
| 9 | AIEPNDYTGK | http://proteomecentral.proteomexchange.org/usi/?usi=mzspec:PXD000561:Adult_CD8Tcells_Gel_Elite_44_f02.mzML:scan:4018:AIEPNDYTGK/2 |
| 10 | NDEIIDATQK | http://proteomecentral.proteomexchange.org/usi/?usi=mzspec:PXD000561:Adult_CD8Tcells_Gel_Elite_44_f03.mzML:scan:4830:NDEIIDATQK/2 |
| 10 | IPGNTNVNYR | http://proteomecentral.proteomexchange.org/usi/?usi=mzspec:PXD000561:Adult_CD8Tcells_Gel_Elite_44_f03.mzML:scan:4830:IPGNTNVNYR/2 |
| 11 | ENIAQAVEHR | http://proteomecentral.proteomexchange.org/usi/?usi=mzspec:PXD000561:Adult_CD8Tcells_Gel_Elite_44_f03.mzML:scan:5359:ENIAQAVEHR/2 |
| 11 | TAQAYEEISR | http://proteomecentral.proteomexchange.org/usi/?usi=mzspec:PXD000561:Adult_CD8Tcells_Gel_Elite_44_f03.mzML:scan:5359:TAQAYEEISR/2 |
| 12 | FNSIPQYSPVTFDR | http://proteomecentral.proteomexchange.org/usi/?usi=mzspec:PXD000561:Adult_CD8Tcells_Gel_Elite_44_f08.mzML:scan:16114:FNSIPQYSPVTFDR/2 |
| 12 | QIEAIDQIHIEYAK | http://proteomecentral.proteomexchange.org/usi/?usi=mzspec:PXD000561:Adult_CD8Tcells_Gel_Elite_44_f08.mzML:scan:16114:QIEAIDQIHIEYAK/2 |
| 12 | IM[UNIMOD:35]DPPSNEAVIISIR | http://proteomecentral.proteomexchange.org/usi/?usi=mzspec:PXD000561:Adult_CD8Tcells_Gel_Elite_44_f08.mzML:scan:16114:IM[UNIMOD:35]DPPSNEAVIISIR/2 |
| 12 | IAENNIQPIFAVTSR | http://proteomecentral.proteomexchange.org/usi/?usi=mzspec:PXD000561:Adult_CD8Tcells_Gel_Elite_44_f08.mzML:scan:16114:IAENNIQPIFAVTSR/2 |
| 13 | IISYIQR | http://proteomecentral.proteomexchange.org/usi/?usi=mzspec:PXD000561:Adult_CD8Tcells_Gel_Elite_44_f17.mzML:scan:9342:IISYIQR/2 |
| 13 | VAIDVGYR | http://proteomecentral.proteomexchange.org/usi/?usi=mzspec:PXD000561:Adult_CD8Tcells_Gel_Elite_44_f17.mzML:scan:9342:VAIDVGYR/2 |
| 13 | FYEAFSK | http://proteomecentral.proteomexchange.org/usi/?usi=mzspec:PXD000561:Adult_CD8Tcells_Gel_Elite_44_f17.mzML:scan:9342:FYEAFSK/2 |
| 13 | IGQGYIIK | http://proteomecentral.proteomexchange.org/usi/?usi=mzspec:PXD000561:Adult_CD8Tcells_Gel_Elite_44_f17.mzML:scan:9342:IGQGYIIK/2 |
| 14 | ISKGANPVEIR | http://proteomecentral.proteomexchange.org/usi/?usi=mzspec:PXD001468:b1946_293T_proteinID_10B_QE3_122212.mzXML:scan:12976:ISKGANPVEIR/2 |
| 14 | AIGDQIEGHSR | http://proteomecentral.proteomexchange.org/usi/?usi=mzspec:PXD001468:b1946_293T_proteinID_10B_QE3_122212.mzXML:scan:12976:AIGDQIEGHSR/2 |
| 14 | TYYYNTETK | http://proteomecentral.proteomexchange.org/usi/?usi=mzspec:PXD001468:b1946_293T_proteinID_10B_QE3_122212.mzXML:scan:12976:TYYYNTETK/2 |
| 14 | NEIPITHETK | http://proteomecentral.proteomexchange.org/usi/?usi=mzspec:PXD001468:b1946_293T_proteinID_10B_QE3_122212.mzXML:scan:12976:NEIPITHETK/2 |
| 14 | YIEDGGIERK | http://proteomecentral.proteomexchange.org/usi/?usi=mzspec:PXD001468:b1946_293T_proteinID_10B_QE3_122212.mzXML:scan:12976:YIEDGGIERK/2 |
| 15 | EYWM[UNIMOD:35]DPEGEMKPGR | http://proteomecentral.proteomexchange.org/usi/?usi=mzspec:PXD001468:b1946_293T_proteinID_10B_QE3_122212.mzXML:scan:37573:EYWM[UNIMOD:35]DPEGEMKPGR/3 |
| 15 | EIC[UNIMOD:4]NAYTEINDPM[UNIMOd:35]R | http://proteomecentral.proteomexchange.org/usi/?usi=mzspec:PXD001468:b1946_293T_proteinID_10B_QE3_122212.mzXML:scan:37573:EIC[UNIMOD:4]NAYTEINDPM[UNIMOd:35]R/3 |
| 15 | TITVRDTM[UNIMOD:35]SDIPEVR | http://proteomecentral.proteomexchange.org/usi/?usi=mzspec:PXD001468:b1946_293T_proteinID_10B_QE3_122212.mzXML:scan:37573:TITVRDTM[UNIMOD:35]SDIPEVR/3 |
| 15 | FPQAITSNTPIKPSNK | http://proteomecentral.proteomexchange.org/usi/?usi=mzspec:PXD001468:b1946_293T_proteinID_10B_QE3_122212.mzXML:scan:37573:FPQAITSNTPIKPSNK/3 |
| 15 | M[UNIMOD:35]DENEFVAVTSTNAAK | http://proteomecentral.proteomexchange.org/usi/?usi=mzspec:PXD001468:b1946_293T_proteinID_10B_QE3_122212.mzXML:scan:37573:M[UNIMOD:35]DENEFVAVTSTNAAK/3 |
